# Supplementary material for: A revised SNP-based barcoding scheme for typing Mycobacterium tuberculosis complex isolates
Source: PubMed Central journal article supplement (PMC10449489; doi:10.1128/msphere.00169-23), 2023-06-14

Bootstrap support

- <75%
- ≥75%
- ≥90%

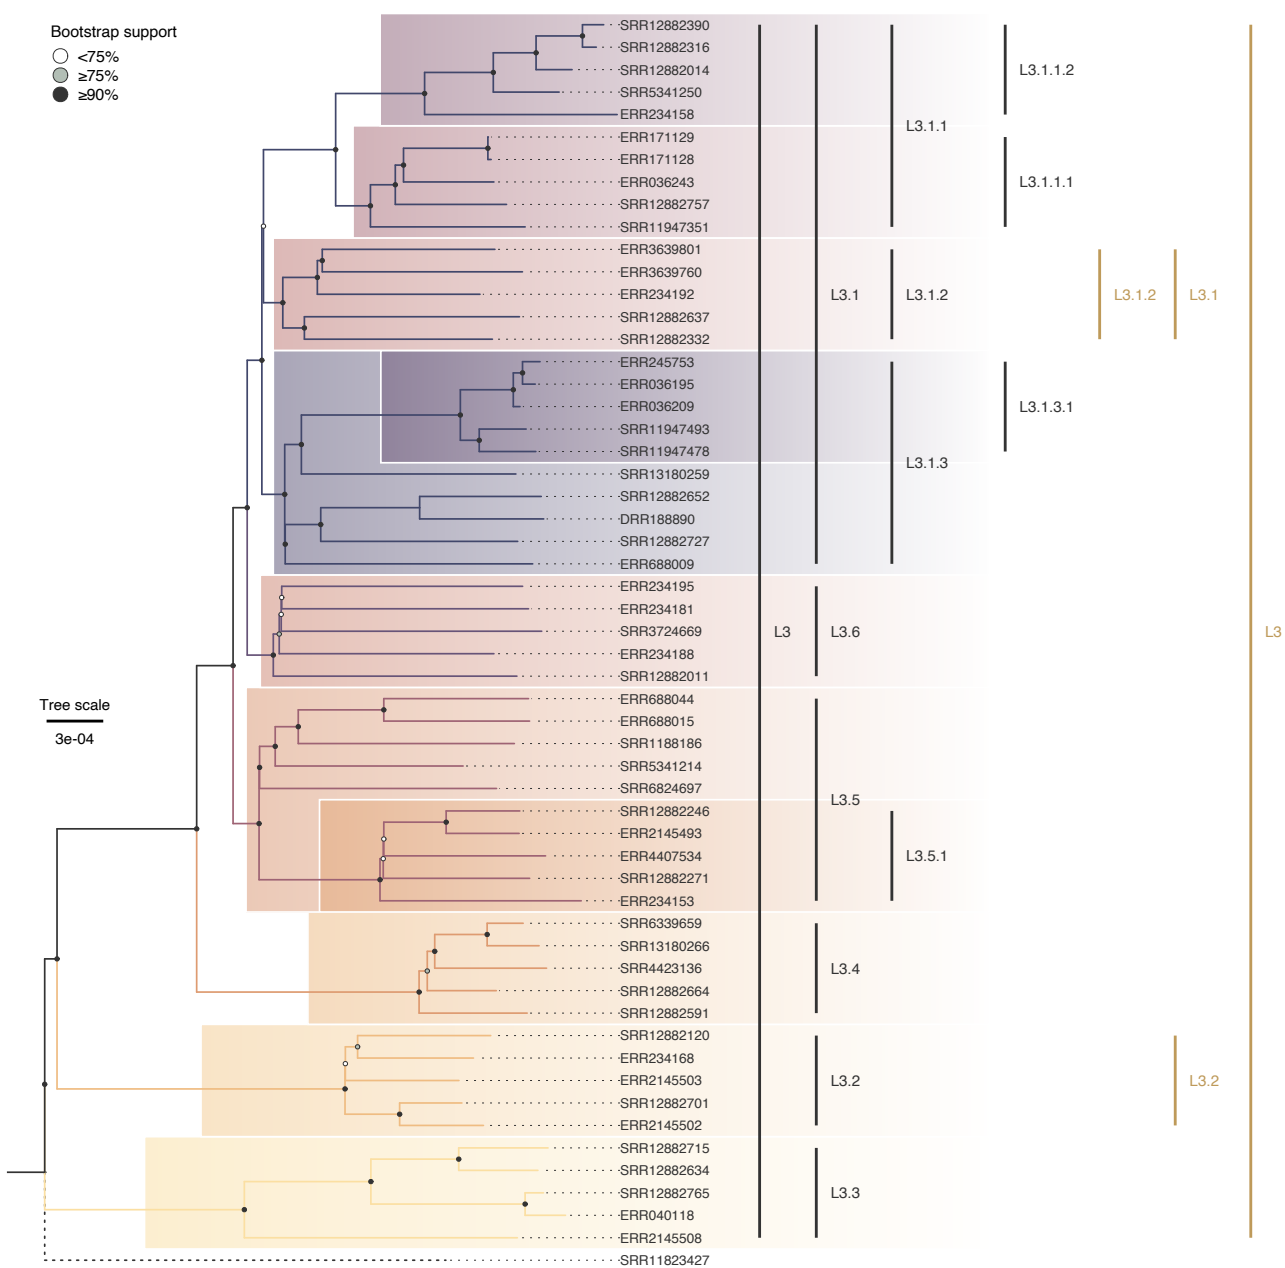

Supplement: msphere.00169-23-s0003.pdf [file msphere.00169-23-s0003.pdf]
